# Supplementary material
Source: publisher figshare collection journal article supplement (https://tandf.figshare.com/ndownloader/files/31958253)
Supplement: Supplementary file 1 [file 31958253]

**Supplementary materials for**

**Impacts of permafrost on above and below ground biomass on the northern Qinghai-Tibetan Plateau**

Cuicui Mu*, Lili Li, Feng Zhang, Yuxing Li, Xiongxin Xiao, Qian Zhao, Tingjun Zhang

**Affiliations:**

Key Laboratory of Western China’s Environmental Systems (MOE), College of Earth and Environmental Sciences, Lanzhou University, Lanzhou, Gansu 730000, China,

*** Corresponding author:** Cuicui Mu

**Address:** Lanzhou University, 222 south Tianshui Road, Lanzhou, China, 730000, **Email:** [mucc@lzu.edu.cn](mailto:mucc@lzu.edu.cn).

**Tel.:** +86-931- 8911843

The supplementary materials showed the variations of soil temperature and moisture at different depths for the sampling sites.


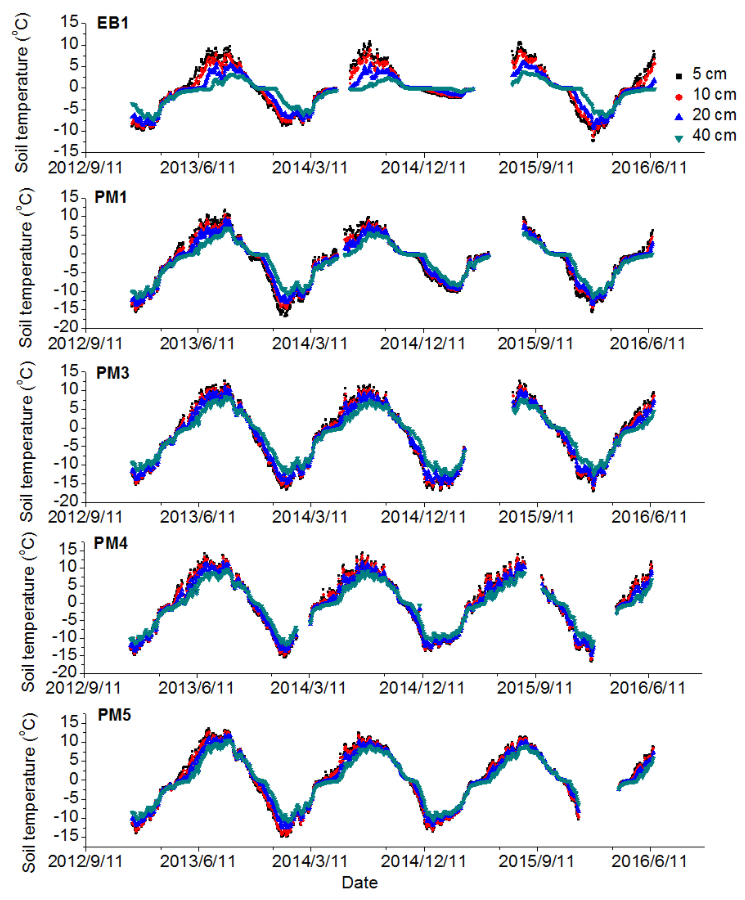


Fig. S1 Variations of soil temperature at depths of 5, 10, 20 and 40 cm in the active layer at sites of EB1, PM1, PM3, PM4 and PM5 during 2012-2016. The lines were not continuous because some of the data were not available.


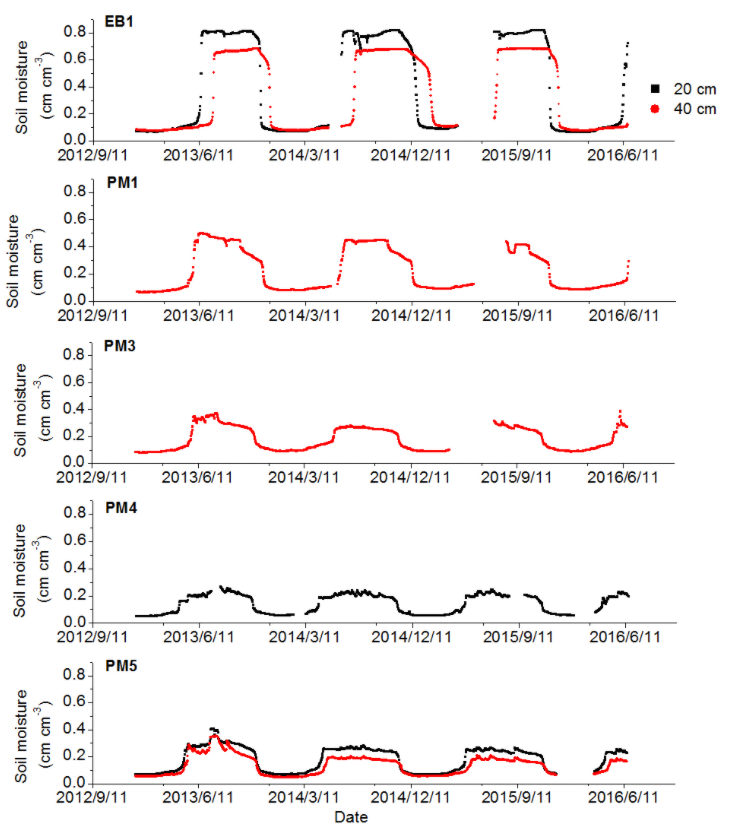


Fig. S2 Variations of soil moisture at depths of 20 and 40 cm in the active layer at sites of EB1, PM1, PM3, PM4 and PM5 during freezing and thawing periods in 2012-2016. The lines were not continuous because some of the data were not available.
